# Supplementary material
Source: publisher site journal article supplement (https://www.dovepress.com/article/461757)
Supplement: Supplementary file 1 [file get_supplementary_file.php]

**Appendix (1). The survey assessing participants’ perception to memes use in pharmacology learning.**

| **First section (Mems’ ranking)** | |
| --- | --- |
| Age |  |
| Sex |  |
| GPA for students (A+, A, B+, B, C+, C, D+, D, F) |  |
| Rank for faculties (full professor, associate professor, assistant professor, lecturer) |  |
| **Rank the memes on a scale (1-10), where1 is the worst and 10 is the best** | |
| Q1 |  |
| Q2 |  |
| Q3 |  |
| Q4 |  |
| Q5 |  |
| Q6 |  |
| Q8 |  |
| **Rank your satisfaction with using memes in pharmacology: (5; very satisfactory, 4; satisfactory, 3; neutral, 2; unsatisfactory, 1; very unsatisfactory)** |  |
| **Second section (Criteria of memes’ preferences)** | |
| **Score the factors they built their preference for a specific meme on:** **(5; strongly agree, 4; agree, 3; neutral, 2; disagree, 1; strongly disagree)** | |
| 1. I prefer direct and easily understandable meme. |  |
| 1. I prefer meme that reflects my own culture. |  |
| 1. I prefer meme that reflects an international culture |  |
| 1. I prefer the meme inspired from a well-known context for me |  |
| 1. I prefer meme that is easy to recall |  |
| 1. I prefer meme that is applicable to a real concrete learning concept |  |
| 1. I prefer meme that is distinctive and novel. This is the first time to see that meme. |  |
| **Third section (Perceived mems’ advantages)** |  |
| **Score the advantages of the used memes from your own point of view:** **(5; strongly agree, 4; agree, 3; neutral, 2; disagree, 1; strongly disagree)** | |
| 1. These memes helped me to solve complex case scenario in the exam |  |
| 1. These memes helped me to understand scientific concepts deeply |  |
| 1. These memes increased my focus on some details |  |
| **Fourth section (The intention of participants to adopt memes)** |  |
| **Score the following items:** **(5; strongly agree, 4; agree, 3; neutral, 2; disagree, 1; strongly disagree)** | |
| 1. I would like to design my own memes and publish them to my colleagues and my tutors |  |
| 1. I would like to share these memes with my colleagues, and on social media |  |
| **Choose one single best answer** | |
| I like the memes inspired from   - Movies - Plays - Social events - Songs - Sports - Tik Tok |  |
